# Supplementary material for: Whole Genome Sequence-Based Analysis of Bovine Gammaherpesvirus 4 Isolated from Bovine Abortions
Source: MDPI journal article supplement (doi:10.3390/v16050739), 2024-05-08
Supplement: s1 [file s1]

Table S1. Bovine Gammaherpesvirus 4 genome sequences available in the GenBank database.

| Strain   | Accession number | Country | Year | Length, nt | Genotype | Reference               |
|----------|------------------|---------|------|------------|----------|-------------------------|
| V.test   | JN133502         | Belgium | 1981 | 108241     | 1        | Palmeira et al., 2011   |
| HB-ZJK   | OP631674         | China   | 2022 | 108778     | 1        | Guo et al., 2023        |
| SD16-38  | MN551083         | USA     | 2016 | 108668     | 1        | Bauermann et al., 2022  |
| 66-p-347 | AF318573         | USA     | -    | 108873     | 1        | Zimmermann et al., 2001 |
| FMV09    | KC999113         | Canada  | 2009 | 108349     | 1        | Cagnon et al., 2017     |
| SD16-49  | MN551084         | USA     | 2016 | 108477     | 1        | Bauermann et al., 2022  |

Table S2. Pairwise nucleotide and amino acid distances of the DPOL gene (ORF 9) among the Bovine Gammaherpesvirus 4 strains available in the GenBank database. Argentinean strains are shown in bold.

[illegible]

Table S3. Pairwise nucleotide and amino acid distances of the gB gene (ORF 8) among the Bovine Gammaherpesvirus 4 strains available in the GenBank database. Argentinean strains are shown in bold.

[illegible]

Table S4. Pairwise nucleotide and amino acid distances of the gH gene (ORF 22) among the Bovine Gammaherpesvirus 4 strains available in the GenBank database. Argentinean strains are shown in bold.

[illegible]

Table S5. Pairwise nucleotide and amino acid distances of the gM gene (ORF 39) among the Bovine Gammaherpesvirus 4 strains available in the GenBank database. Argentinean strains are shown in bold.

[illegible]

Table S6. Pairwise nucleotide and amino acid distances of the gL gene (ORF 47) among the Bovine Gammaherpesvirus 4 strains available in the GenBank database. Argentinean strains are shown in bold.

[illegible]

[illegible][illegible]

[illegible][illegible]

Table S11. Pairwise nucleotide and amino acid distances of the TK gene (ORF 21) among the Bovine Gammaherpesvirus 4 strains available in the GenBank database. Argentinean strains are shown in bold.

|                        | 66-p-347 | SD16-38 | HB-ZJK | FMV09 | SD16-49 | V.test | <b>10-154</b> | <b>07-435</b> |
|------------------------|----------|---------|--------|-------|---------|--------|---------------|---------------|
| Amino acid distance, % |          |         |        |       |         |        |               |               |
| 66-p-347               | -        | 0       | 1.35   | 1.35  | 1.35    | 0.67   | 0.9           | 3.6           |
| SD16-38                | 0        | -       | 1.35   | 1.35  | 1.35    | 0.67   | 0.9           | 3.6           |
| HB-ZJK                 | 1.27     | 1.27    | -      | 1.8   | 1.8     | 1.57   | 1.35          | 3.6           |
| FMV09                  | 1.12     | 1.12    | 1.79   | -     | 0       | 1.57   | 1.35          | 3.82          |
| SD16-49                | 1.12     | 1.12    | 1.79   | 0     | -       | 1.57   | 1.35          | 3.82          |
| V.test                 | 0.37     | 0.37    | 1.35   | 1.05  | 1.05    | -      | 1.12          | 3.82          |
| <b>10-154</b>          | 0.82     | 0.82    | 0.75   | 1.35  | 1.35    | 0.9    | -             | <b>3.15</b>   |
| <b>07-435</b>          | 3.51     | 3.51    | 3.06   | 3.66  | 3.66    | 3.59   | <b>3.14</b>   | -             |
| Nucleotide distance, % |          |         |        |       |         |        |               |               |

Table S12. Geodesic distance between the bovine Gammaherpesvirus complete genome and ORF phylogenetic trees.

| ORF  | Geodesic distance* |
|------|--------------------|
| TK   | 0.0145             |
| IE2  | 0.015              |
| MCP  | 0.0195             |
| gM   | 0.0249             |
| gH   | 0.0261             |
| DPOL | 0.033              |
| gp80 | 0.0394             |
| Bo17 | 0.0396             |
| gB   | 0.0501             |
| gL   | 0.0987             |

\*ORFs are ordered from shortest to longest geodesic distance.

Table S13. Possible recombination events in the analyzed Bovine Gammaherpesvirus 4 ORFs.

| Event recombination number | Sequence <sup>#</sup> | Major parent    | Minor parent      |
|----------------------------|-----------------------|-----------------|-------------------|
| <b>DPOL gene</b>           |                       |                 |                   |
| 1*                         | OQ709765_07-435       | Unknown         | MN551084_SD16-49  |
|                            | OQ709766_10-154       | Unknown         | AF318573_66-p-347 |
| 2*                         | OQ709765_07-435       | Unknown         | MN551084_SD16-38  |
|                            | OQ709766_10-154       | Unknown         | AF318573_66-p-347 |
| <b>gB gene</b>             |                       |                 |                   |
| 1*                         | OQ709765_07-435*      | Unknown         | MN551084_SD16-49  |
| 2                          | OQ709766_10-154       | OP631674_HB-ZJK | MN551084_SD16-49  |
| <b>gH gene</b>             |                       |                 |                   |
| 1*                         | OQ709766_10-154*      | OP631674_HB-ZJK | MN551084_SD16-49  |

<sup>#</sup>No recombination event was detected in gL, gM, gp80, IE2, MCP, Bo17, and TK.

\*Recombination might not have caused this signal.

## 07-435

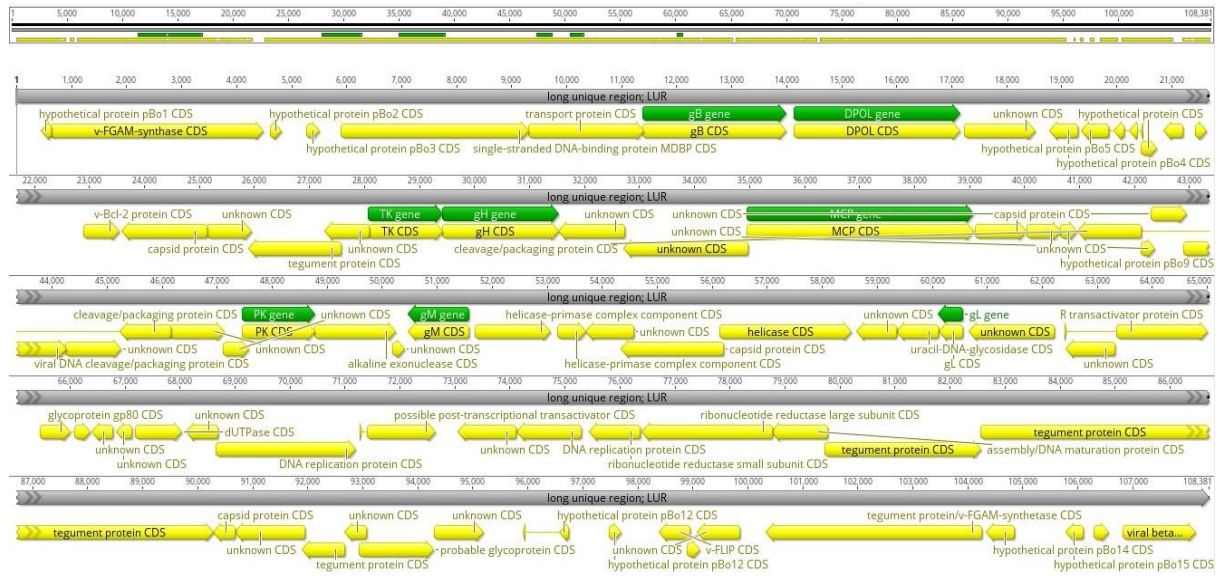

## 10-154

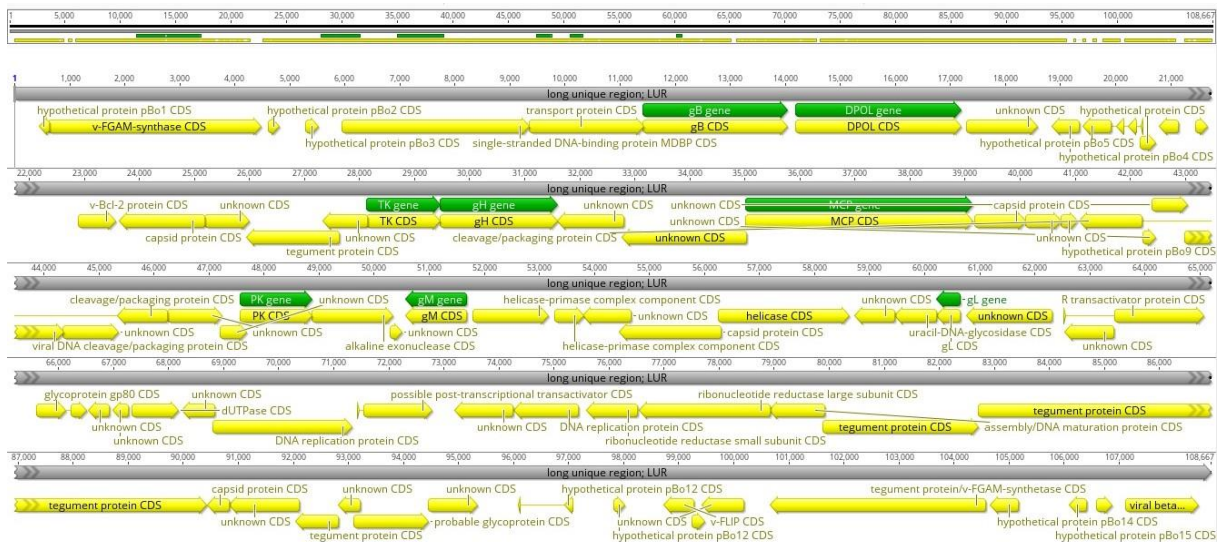

Figure S1. Organization of BoGHV-4 07-435 and 10-154 genome map. The genomes contain a long unique sequence region (LUR) and 79 open reading frames. The map was drawn by Geneious Prime 2023.0.4 software (<https://www.geneious.com>).



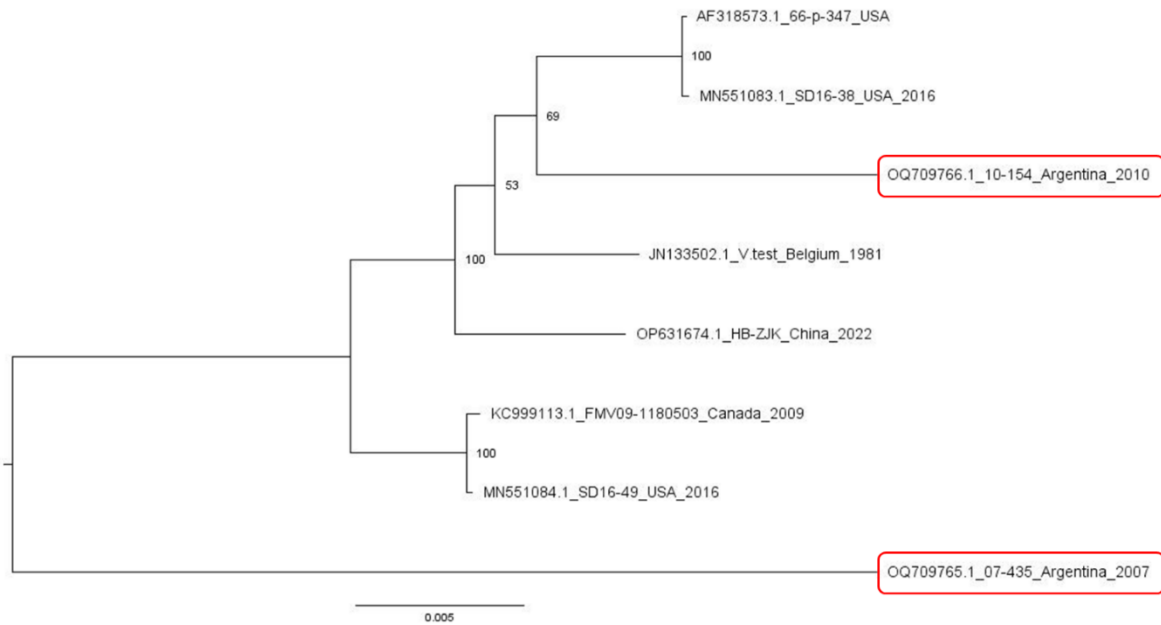

Figure S2. Maximum likelihood phylogenetic trees based on Bovine Gammaherpesvirus 4 genomes. Ultrafast bootstrap values (1000 replicates) are shown. The tree is midpoint-rooted for clarity. Bovine Gammaherpesvirus 4 genomes reported in the current study are highlighted by red boxes.

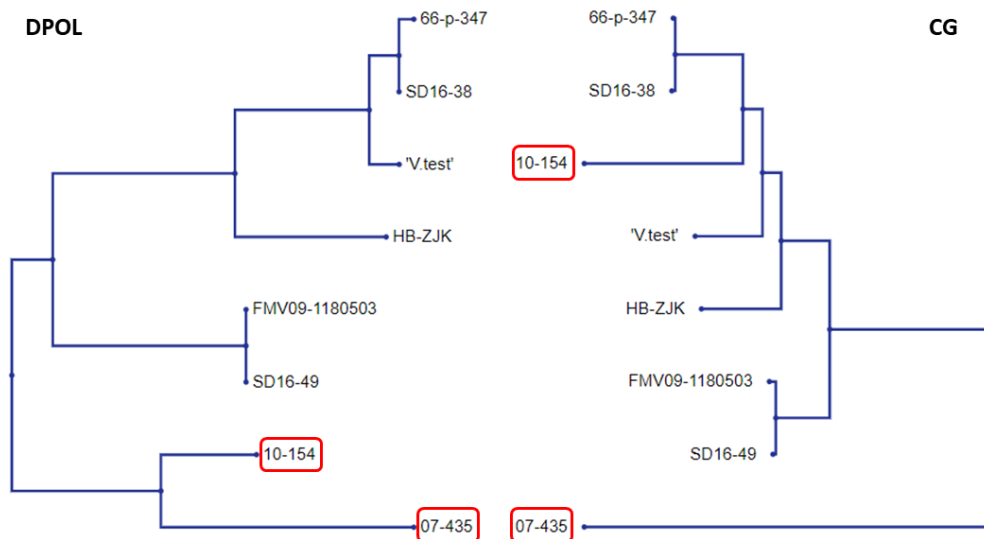

Figure S3. Comparison of phylogenetic trees obtained from the Bovine Gammaherpesvirus 4 genome (right) and DPOL (left) sequences. Bovine herpesvirus 4 strains reported in the current study are highlighted by red boxes. The trees were displayed using the Phylo.io application (Robinson et al., 2016) in the TreeCmp software v2.0 (Goluch et al., 2020).

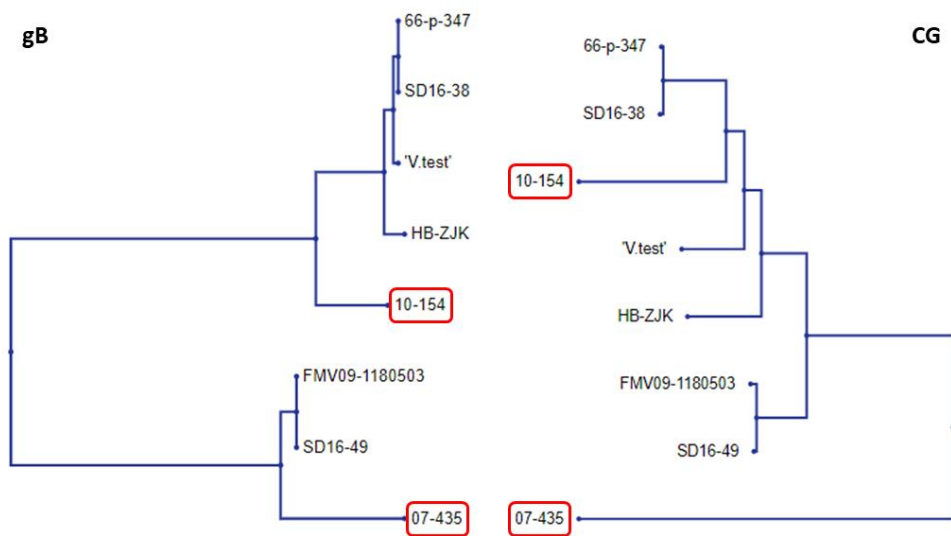

Figure S4. Comparison of phylogenetic trees obtained the Bovine Gammaherpesvirus 4 genome (right) and gB (left) sequences. Bovine herpesvirus 4 strains reported in the current study are highlighted by red boxes. The trees were displayed using the Phylo.io application (Robinson et al., 2016) in the TreeCmp software v2.0 (Goluch et al., 2020).

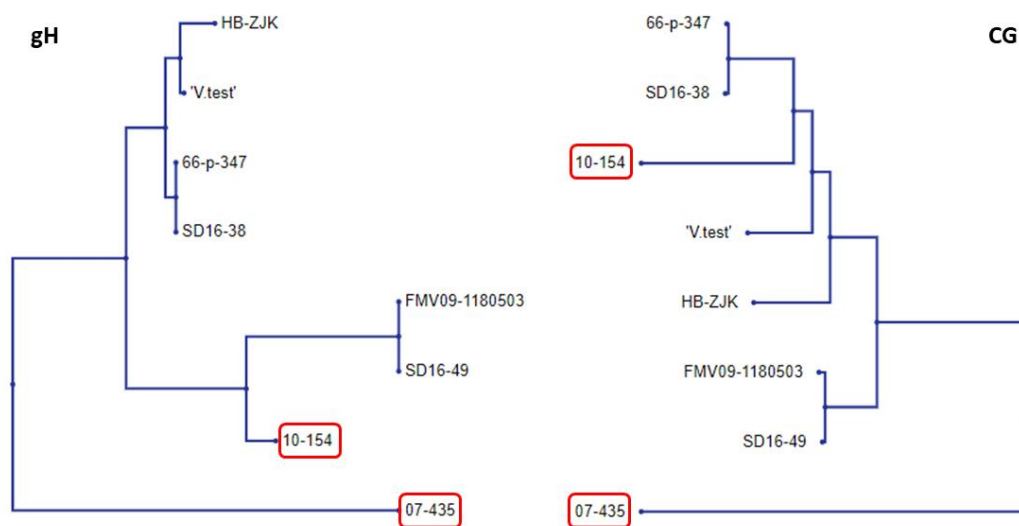

Figure S5. Comparison of phylogenetic trees obtained the Bovine Gammaherpesvirus 4 genome (right) and gH (left) sequences. Bovine Gammaherpesvirus 4 strains reported in the current study are highlighted by red boxes. The trees were displayed using the Phylo.io application (Robinson et al., 2016) in the TreeCmp software v2.0 (Goluch et al., 2020).

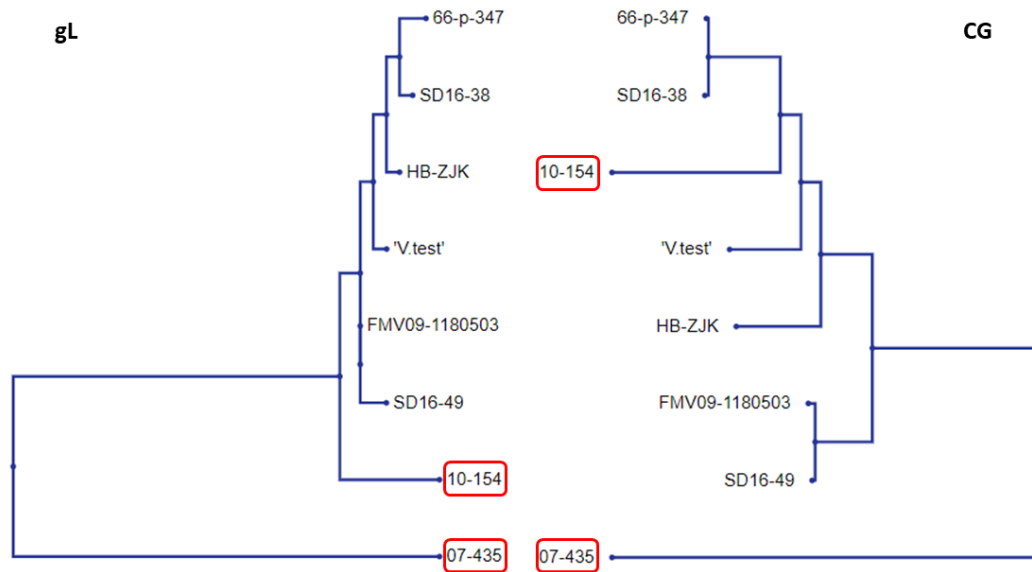

Figure S6. Comparison of phylogenetic trees obtained the Bovine Gammaherpesvirus 4 genome (right) and gL (left) sequences. Bovine Gammaherpesvirus 4 strains reported in the current study are highlighted by red boxes The trees were displayed using the Phylo.io application (Robinson et al., 2016) in the TreeCmp software v2.0 (Goluch et al., 2020).

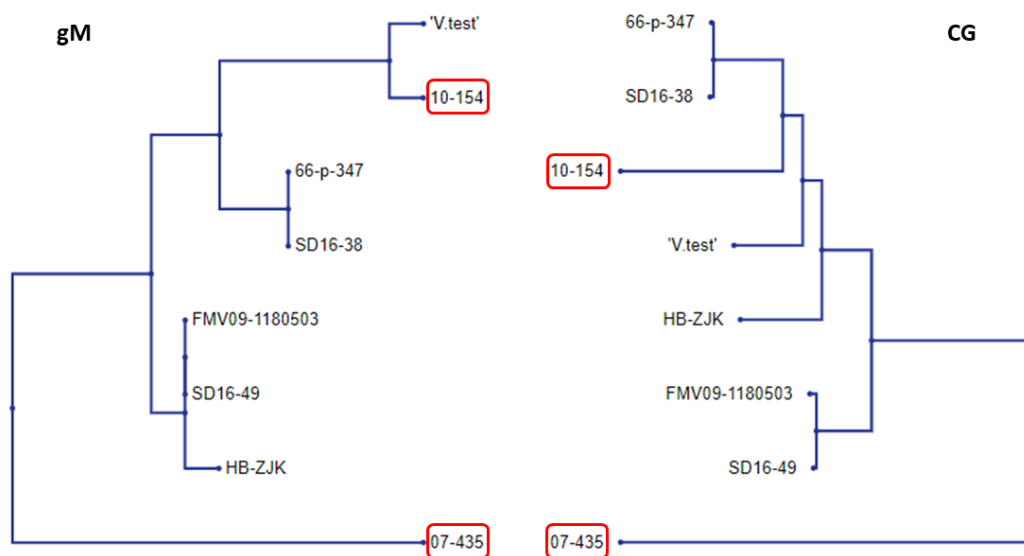

Figure S7. Comparison of phylogenetic trees obtained the bovine herpesvirus 4 genome (right) and gM (left) sequences. Bovine Gammaherpesvirus 4 strains reported in the current study are highlighted by red boxes. The trees were displayed using the Phylo.io application (Robinson et al., 2016) in the TreeCmp software v2.0 (Goluch et al., 2020).

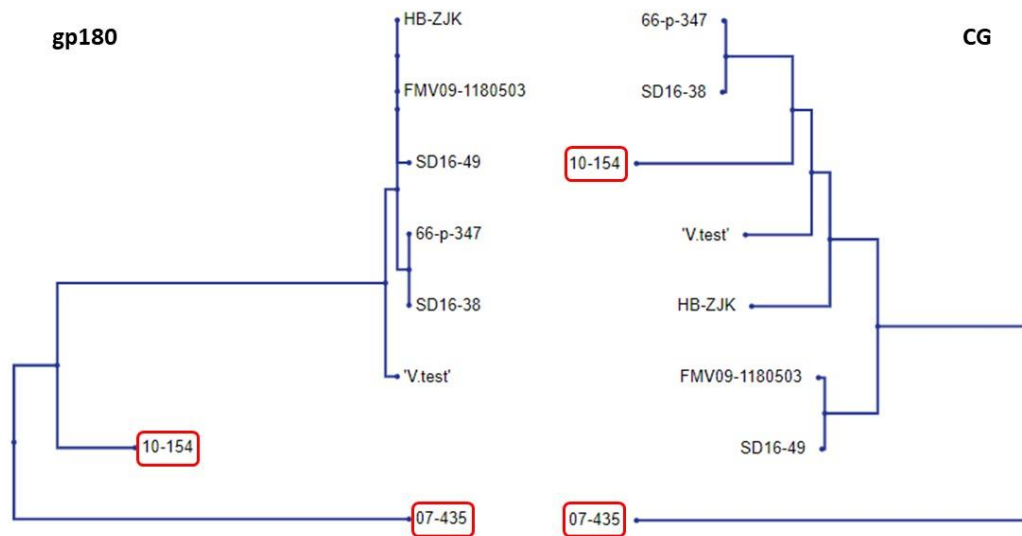

Figure S8. Comparison of phylogenetic trees obtained the Bovine Gammaherpesvirus 4 genome (right) and gp180 (left) sequences. Bovine Gammaherpesvirus 4 strains reported in the current study are highlighted by red boxes. The trees were displayed using the Phylo.io application (Robinson et al., 2016) in the TreeCmp software v2.0 (Goluch et al., 2020).

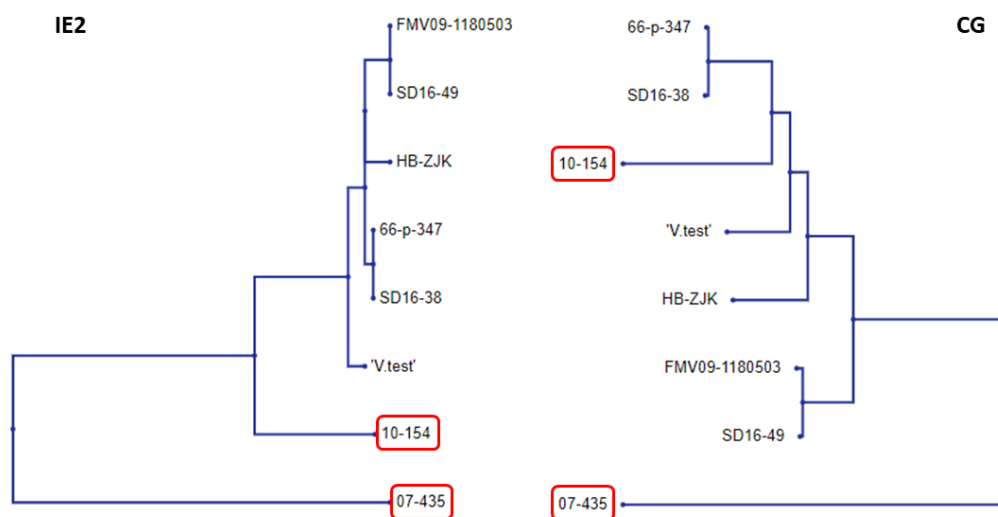

Figure S9. Comparison of phylogenetic trees obtained the Bovine Gammaherpesvirus 4 genome (right) and IE2 (left) sequences. Bovine Gammaherpesvirus 4 strains reported in the current study are highlighted by red boxes. The trees were displayed using the Phylo.io application (Robinson et al., 2016) in the TreeCmp software v2.0 (Goluch et al., 2020).

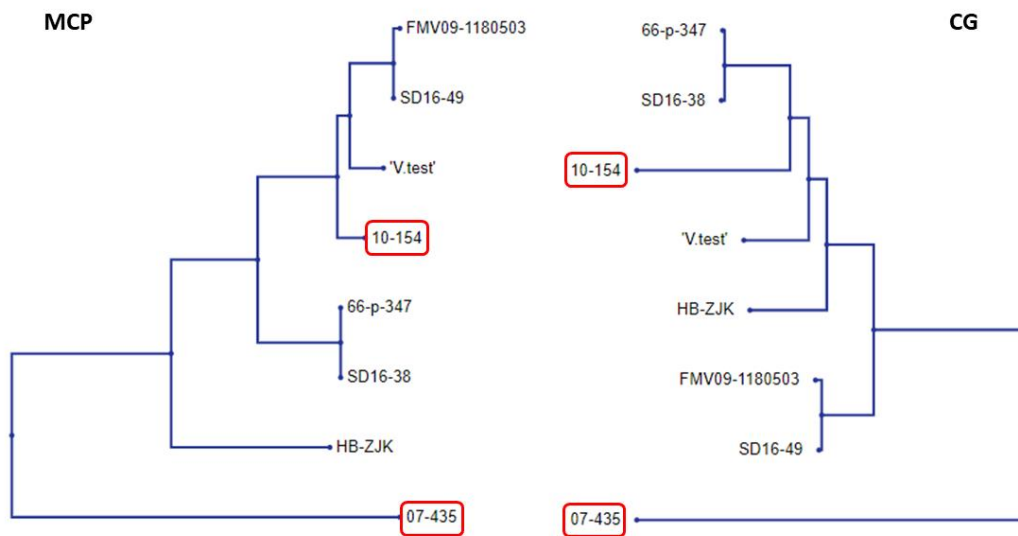

Figure S10. Comparison of phylogenetic trees obtained the Bovine Gammaherpesvirus 4 genome (right) and MCP (left) sequences. Bovine Gammaherpesvirus 4 strains reported in the current study are highlighted by red boxes. The trees were displayed using the Phylo.io application (Robinson et al., 2016) in the TreeCmp software v2.0 (Goluch et al., 2020).

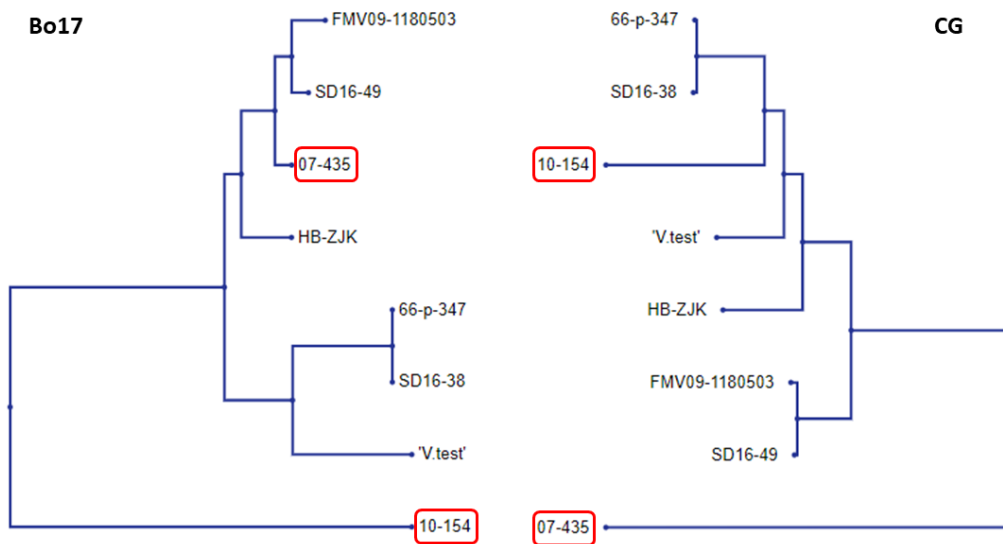

Figure S11. Comparison of phylogenetic trees obtained the Bovine Gammaherpesvirus 4 genome (right) and Bo17 (left) sequences. Bovine Gammaherpesvirus 4 strains reported in the current study are highlighted by red boxes. The trees were displayed using the Phylo.io application (Robinson et al., 2016) in the TreeCmp software v2.0 (Goluch et al., 2020).

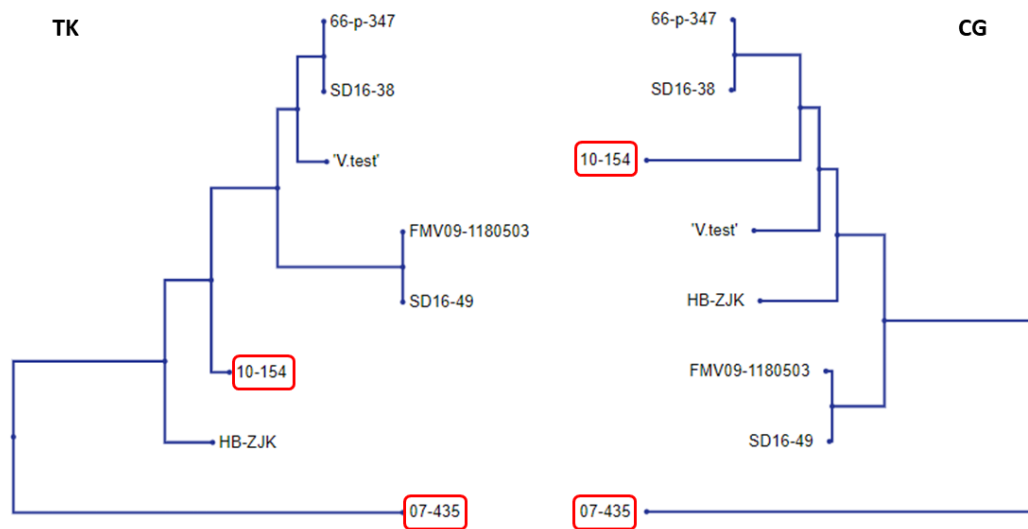

Figure S12. Comparison of phylogenetic trees obtained the Bovine Gammaherpesvirus 4 genome (right) and TK (left) sequences. Bovine Gammaherpesvirus 4 strains reported in the current study are highlighted by red boxes. The trees were displayed using the Phylo.io application (Robinson et al., 2016) in the TreeCmp software v2.0 (Goluch et al., 2020).
